# Supplementary material for: Boosting the oxygen evolution reaction via the reconstruction of an M(OH)x/Fe3O4 catalyst
Source: Royal Society of Chemistry journal article supplement (doi:10.1039/d4qi01574f), 2024-01-01
Supplement: d4qi01574f1.pdf [file d4qi01574f1.pdf]

## Boosting the Oxygen Evolution Reaction via the Reconstruction of $M(OH)_x/Fe_3O_4$ Catalyst

Xiaoqu Wang,<sup>a,c,†</sup> Limin Wang,<sup>a,†</sup> Yongchun Liu,<sup>a,†</sup> Rajkumar Devasenathipathy,<sup>b</sup> Li Liu,<sup>a</sup> Qiulan Huang,<sup>a</sup> Dajuan Huang,<sup>a</sup> Youjun Fan,<sup>\*a</sup> Du-Hong Chen<sup>\*a</sup> and Wei Chen<sup>\*a</sup>

<sup>a</sup> *Guangxi Key Laboratory of Low Carbon Energy Materials, School of Chemistry and Pharmaceutical Sciences, Guangxi Normal University, Guilin 541004, China*

<sup>b</sup> *Institute of Advanced Materials (IAM), Nanjing Tech University (Nanjing Tech), Nanjing 211816, China*

<sup>c</sup> *School of Materials and Energy, Institute of Energy Storage Technologies, Yunnan University, Kunming 650091, China*

\* Corresponding authors.

*E-mail addresses:* youjunfan@mailbox.gxnu.edu.cn (Y. Fan), dhchen@gxnu.edu.cn (D. H. Chen), weichen@mailbox.gxnu.edu.cn (W. Chen).

† These authors contributed equally to the work.

## 1. Supporting Theoretical Calculation Details

The Vienna Ab initio Simulation Package was used for all density functional theory (DFT) calculations.<sup>1</sup> Utilizing the PBE generalized gradient approximation exchange-correlation function, the projector augmented wave pseudopotential was employed in the computations.<sup>2,3</sup> To account for strongly localized d-electrons for Ni and Fe, all metal oxide energetics were computed using the DFT with the Hubbard-U framework (DFT+U). According to linear response theory, the Hubbard-U correction terms were at  $U_{\text{eff}}(\text{Ni}) = 6.2$  eV and  $U_{\text{eff}}(\text{Fe}) = 5.3$  eV. The adsorption energy was calculated using K-sampling with a Monkhorst-Pack mesh of  $3 \times 3 \times 1$ , the DOS was calculated using  $9 \times 9 \times 1$ , and the cutoff energy of the plane waves basis set was 500 eV. The ultimate force on each atom was less than  $0.05 \text{ eV \AA}^{-1}$ , all structures were spin polarized, and all atoms were totally relaxed with an energy convergence tolerance of  $10^{-5}$  eV per atom.

The adsorption energy of intermediates was computed using the following Equation (1):

$$\Delta G_{\text{ads}} = E_{\text{ads}} - E_{*} + \Delta E_{\text{ZPE}} - T\Delta S \quad (1)$$

Where ads represents  $\text{OH}^*$ ,  $\text{O}^*$ ,  $\text{OOH}^*$ , and the  $(E_{\text{ads}} - E_{*})$  corresponds to the binding energy,  $\Delta E_{\text{ZPE}}$  refers to the zero-point energy change,  $\Delta S$  was regarded as the entropy change. The calculated  $\Delta E_{\text{ZPE}}$  and  $\Delta S$  were grasped by vibration frequency calculation.

The Gibbs free energy of the four reaction steps refers to the following four Equations (2) – (5):

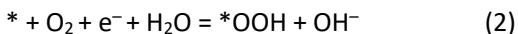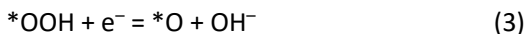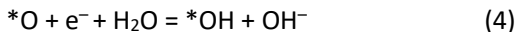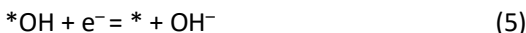

## 2. Supporting Figures and Table

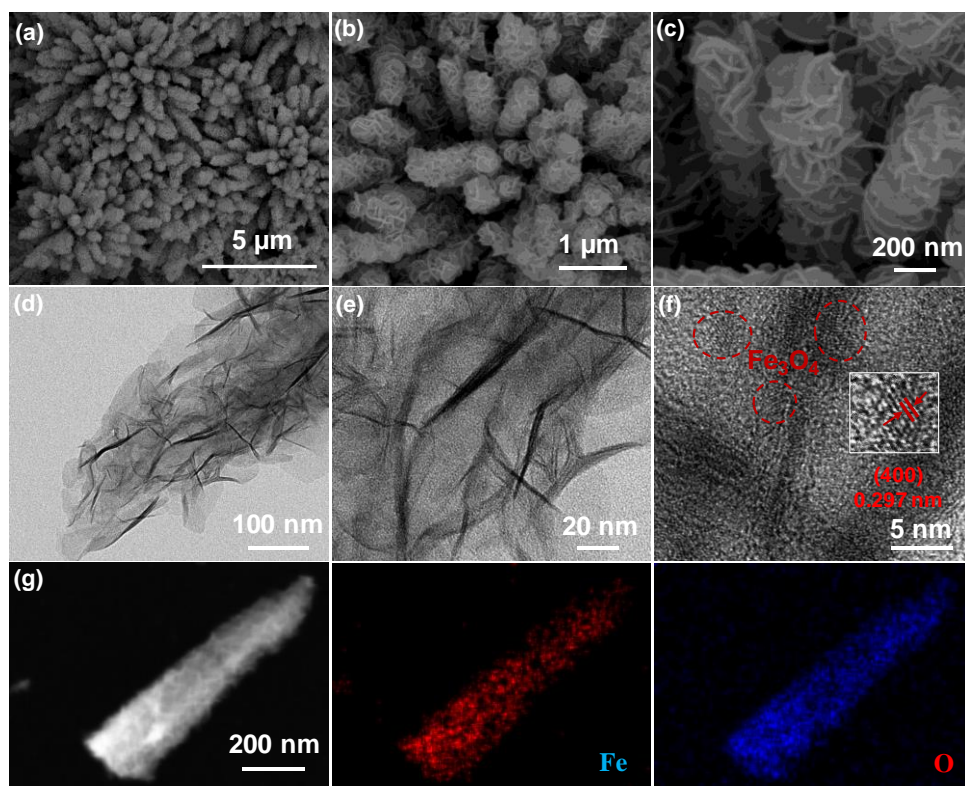

Fig. S1 SEM (a–c) and TEM (d–g) images Fe<sub>3</sub>O<sub>4</sub>/IF.

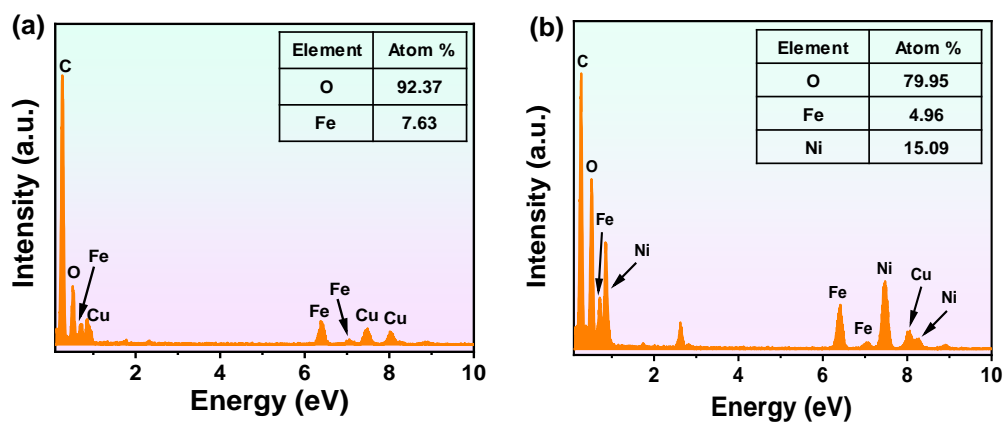

Fig. S2 TEM-EDX spectra of Fe<sub>3</sub>O<sub>4</sub>/IF (a) and M(OH)<sub>x</sub>/Fe<sub>3</sub>O<sub>4</sub>/IF (b).

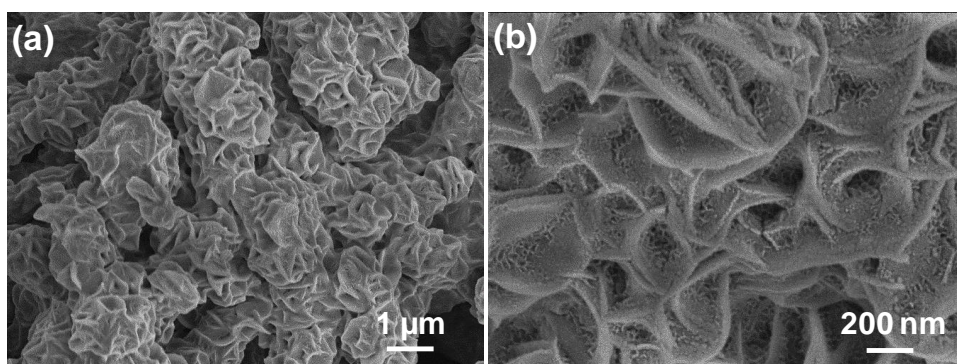

**Fig. S3** SEM images of  $M(OH)_x/Fe_3O_4/IF (H_2O)$ .

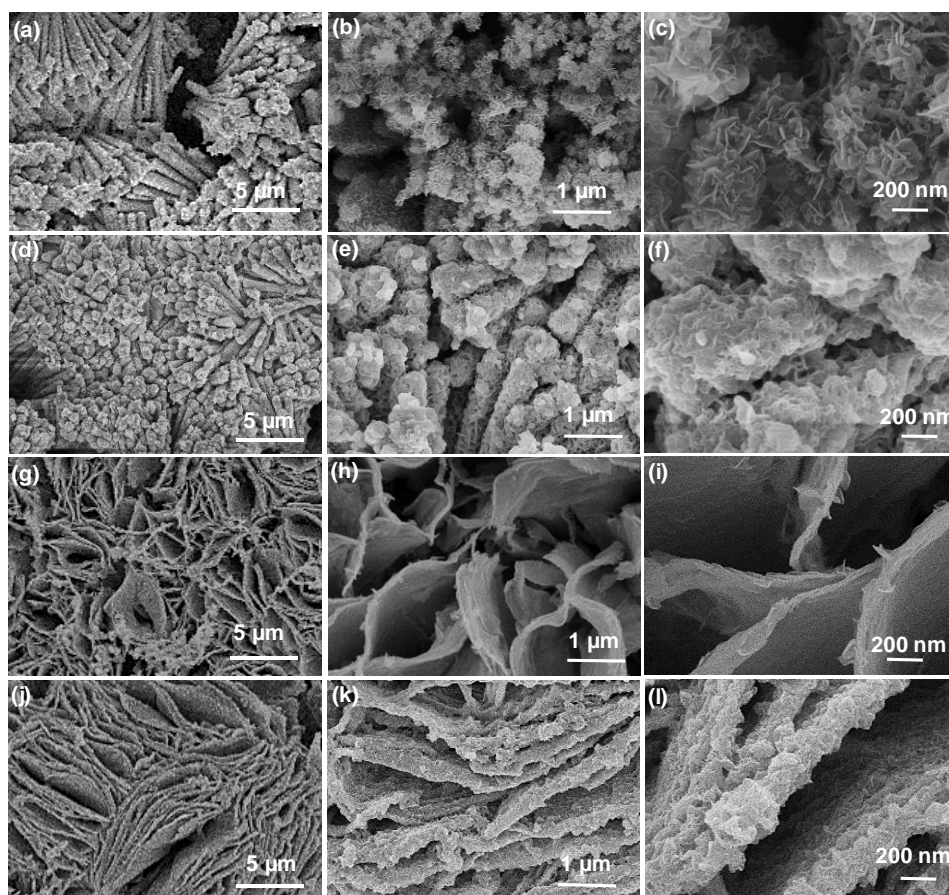

**Fig. S4** (a–c) SEM images of  $Fe_3O_4/IF (SO_4^{2-})$ . (d–f) SEM images of  $M(OH)_x/Fe_3O_4/IF (SO_4^{2-})$ . (g–i) SEM images of  $Fe_3O_4/IF (Br^-)$ . (j–l) SEM images of  $M(OH)_x/Fe_3O_4/IF (Br^-)$ .

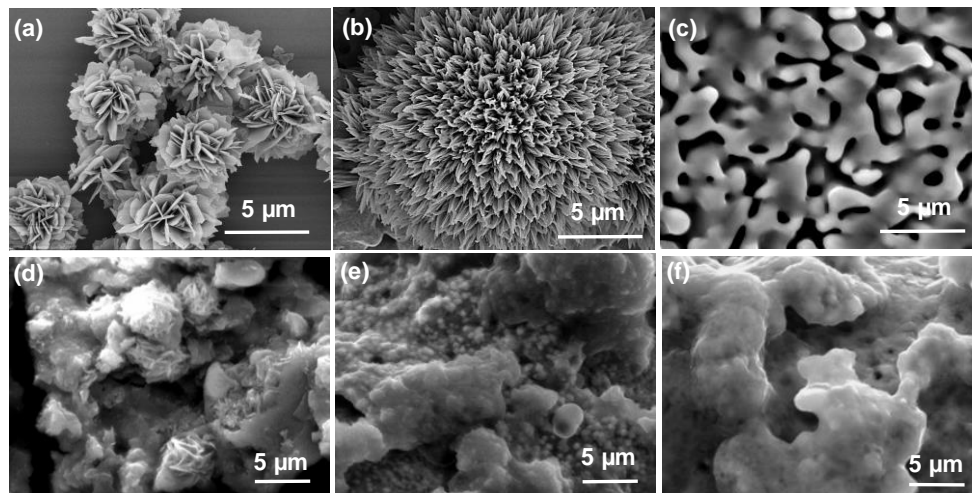

**Fig. S5** SEM images of  $\text{Fe}_3\text{O}_4$  powder (a),  $\text{Fe}_3\text{O}_4/\text{IF}$  (no metal salts) (b), IF (c),  $\text{M}(\text{OH})_x/\text{Fe}_3\text{O}_4$  powder (d),  $\text{M}(\text{OH})_x/\text{Fe}_3\text{O}_4/\text{IF}$  (no metal salts) (e), and  $\text{M}(\text{OH})_x/\text{IF}$  (f).

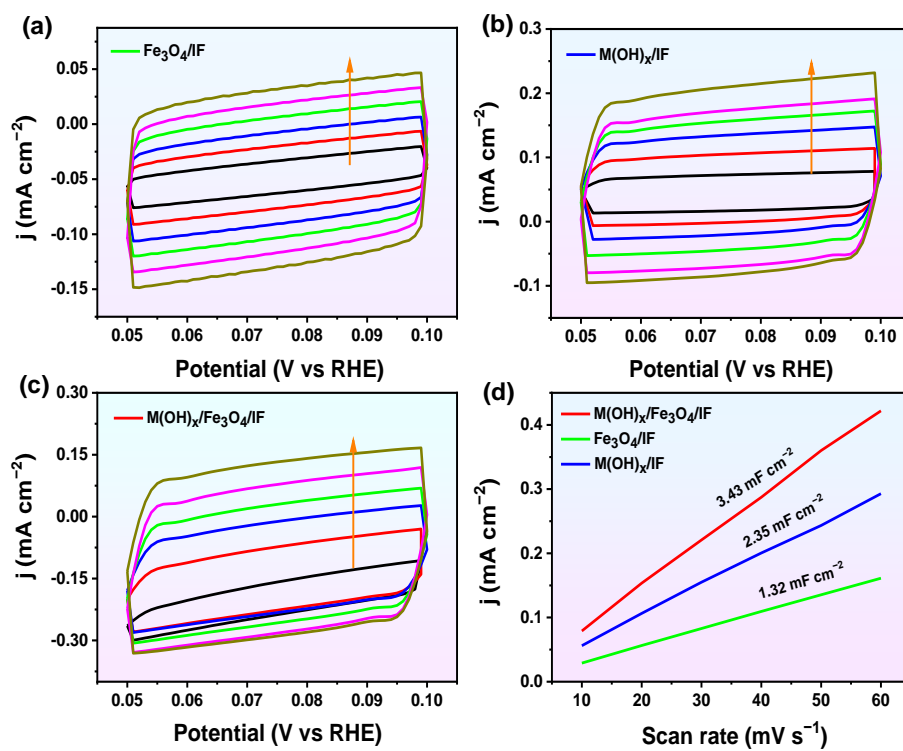

**Fig. S6** Cyclic voltammograms of  $\text{Fe}_3\text{O}_4/\text{IF}$  (a),  $\text{M}(\text{OH})_x/\text{IF}$  (b), and  $\text{M}(\text{OH})_x/\text{Fe}_3\text{O}_4/\text{IF}$  (c) recorded at a double layer region with the increasing scan rates of 10, 20, 30, 40, 50, and 60  $\text{mV s}^{-1}$ . (d) The plots of current density vs scanning rate.

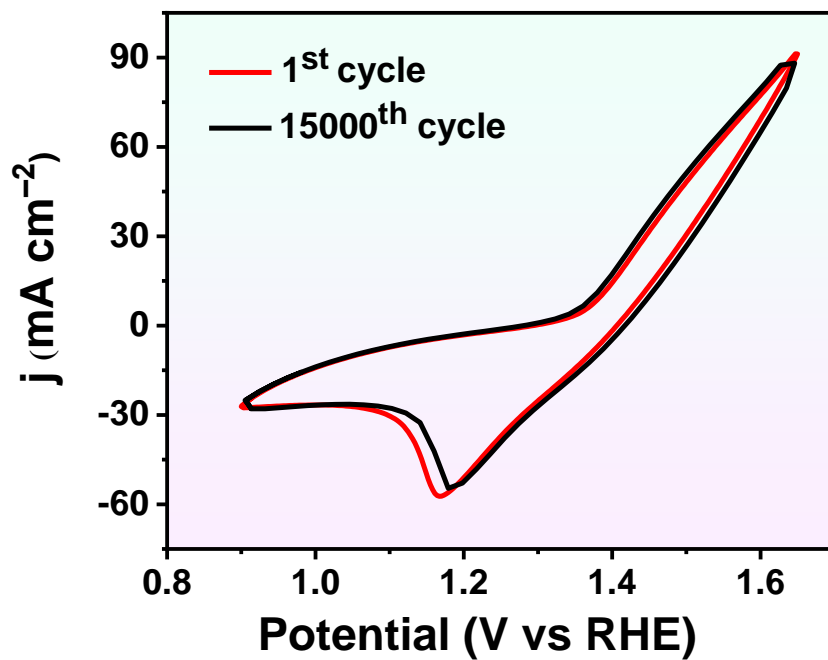

**Fig. S7** The CV curves of the 1<sup>st</sup> and 15000<sup>th</sup> of  $M(OH)_x/Fe_3O_4/IF$  electrode at the potential of 0.9 to 1.65 V vs. RHE recorded in  $N_2$ -saturated 1 M KOH at  $100\text{ mV s}^{-1}$ .

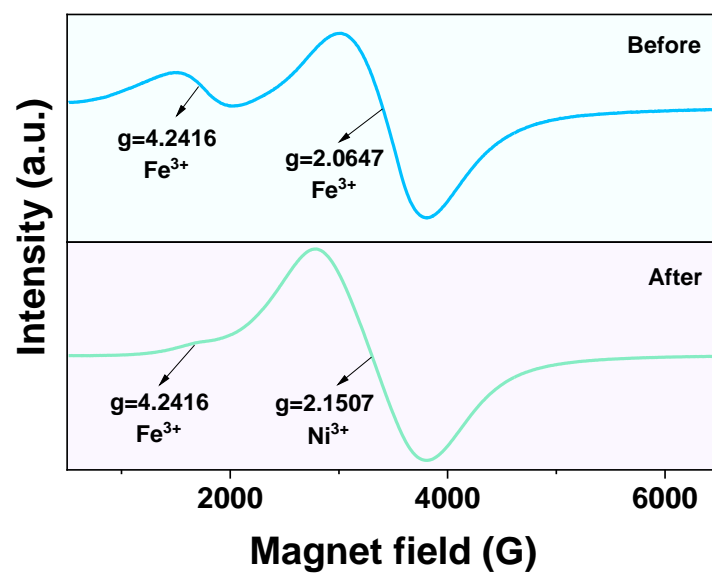

**Fig. S8** The EPR spectra of M(OH)<sub>x</sub>/Fe<sub>3</sub>O<sub>4</sub>/IF electrode before and after OER measurement.

**Table S1.** Comparisons of catalytic performance of  $M(OH)_x/Fe_3O_4/IF$  and other electrocatalysts reported recently for OER.

| Catalyst                               | Electrolyte | Overpotentials                                     | Tafel                               | Stability<br>(h) | Ref.                                                      |
|----------------------------------------|-------------|----------------------------------------------------|-------------------------------------|------------------|-----------------------------------------------------------|
|                                        |             | (mV)@<br>Current density<br>(mA cm <sup>-2</sup> ) | slope<br>(mV<br>dec <sup>-1</sup> ) |                  |                                                           |
| $M(OH)_x/Fe_3O_4/IF$                   | 1 M KOH     | 214@50<br>311@500                                  | 57                                  | 70               | This work                                                 |
| 2% Ru-NCO                              | 1 M KOH     | 233@50<br>269@100                                  | 59                                  | 25               | <i>Chem. Eng. J.</i> <b>2022</b> , 439,<br>135634.        |
| NCF-C3                                 | 1 M KOH     | 343@100                                            | 63                                  | 20               | <i>Chem. Eng. J.</i> <b>2021</b> , 426,<br>130785.        |
| B-MOF-Zn-Co                            | 1 M KOH     | 362@100                                            | 66.8                                | 300              | <i>Small</i> <b>2023</b> , 2308517.                       |
| Ni-B-P micro spheres                   | 1 M KOH     | 360@300                                            | 153                                 | 120              | <i>Chem. Eng. J.</i> <b>2023</b> , 462,<br>142177.        |
| Ni <sub>3</sub> S <sub>2</sub> /NF     | 1 M KOH     | 330@100                                            | 70                                  | 2.8              | <i>Adv. Mater.</i> <b>2017</b> , 29,<br>1701584.          |
| VOx/Ni <sub>3</sub> S <sub>2</sub> @NF | 1 M KOH     | 330@100                                            |                                     |                  | <i>J. Mater. Chem. A</i> <b>2019</b> , 7,<br>10534-10542. |
| NiSO-2                                 | 1 M KOH     | 320@100<br>400@500                                 | 46                                  | 100              | <i>Chem. Eng. J.</i> <b>2023</b> , 475,<br>146140.        |
| CoP-Co <sub>2</sub> P@PC/PG NHs        | 1 M KOH     | 272@20                                             | 66                                  |                  | <i>Small</i> <b>2019</b> , 15, 1804546.                   |
| NiFeB hydroxide<br>nanosheets          | 1 M KOH     | 252@100                                            |                                     | 130              | <i>Nat. Commun.</i> <b>2022</b> , 13,<br>6094.            |



## Supporting References

1. G. K. J. Furthmiiller, Efficient Iterative Schemes for ab Initio Total-Energy Calculations Using a Plane-Wave Basis Set, *Phys. Rev. B* 1996, **54**, 11169.
2. P. E. Blöchl, Projector Augmented-Wave Method, *Phys. Rev. B*, 1994, **50**, 17953–17979.
3. K. B. John P. Perdew, Matthias Ernzerhof, Generalized Gradient Approximation Made Simple, *Phys. Rev. Lett.*, 1996, **77**, 3865.
